# Supplementary material for: PfMSA180 is a novel Plasmodium falciparum vaccine antigen that interacts with human erythrocyte integrin associated protein (CD47)
Source: PubMed Central journal article supplement (PMC6459815; doi:10.1038/s41598-019-42366-9), 2019-04-11

# SUPPLEMENTARY DATA FILE 1

## **PfMSA180 is a novel *Plasmodium falciparum* vaccine antigen that interacts with human erythrocyte integrin associated protein (CD47)**

Hikaru Nagaoka<sup>1</sup>, Chisa Sasaoka<sup>1</sup>, Takaaki Yuguchi<sup>1</sup>, Bernard N. Kanoi<sup>1</sup>, Daisuke Ito<sup>2</sup>, Masayuki Morita<sup>1</sup>, Rachanee Udomsangpetch<sup>3</sup>, Jetsumon Sattabongkot<sup>4</sup>, Tomoko Ishino<sup>5</sup>, Takafumi Tsuboi<sup>1</sup>, Eizo Takashima<sup>1,\*</sup>

<sup>1</sup> Division of Malaria Research, Proteo-Science Center, Ehime University, 3 Bunkyo-cho, Matsuyama, Ehime 790-8577, Japan;

<sup>2</sup> Division of Medical Zoology, Department of Microbiology and Immunology, Faculty of Medicine, Tottori University, 86 Nishi-cho, Yonago, Tottori 683-8503, Japan;

<sup>3</sup> Center for Research and Innovation, Faculty of Medical Technology, Mahidol University, Salaya, Nakhosn Pathom 73170, Thailand;

<sup>4</sup> Mahidol Vivax Research Unit, Faculty of Tropical Medicine, Mahidol University, Bangkok 10400, Thailand;

<sup>5</sup> Division of Molecular Parasitology, Proteo-Science Center, Ehime University, Toon Ehime 791-0295, Japan

\* Corresponding author

Address: Division of Malaria Research, Proteo-Science Center, Ehime University, Japan, 3 Bunkyo-cho, Matsuyama, Ehime 790-8577, Japan. Tel.: (+81) 89 927 9939. E-mail address: takashima.eizo.mz@ehime-u.ac.jp

**Fig 1****B**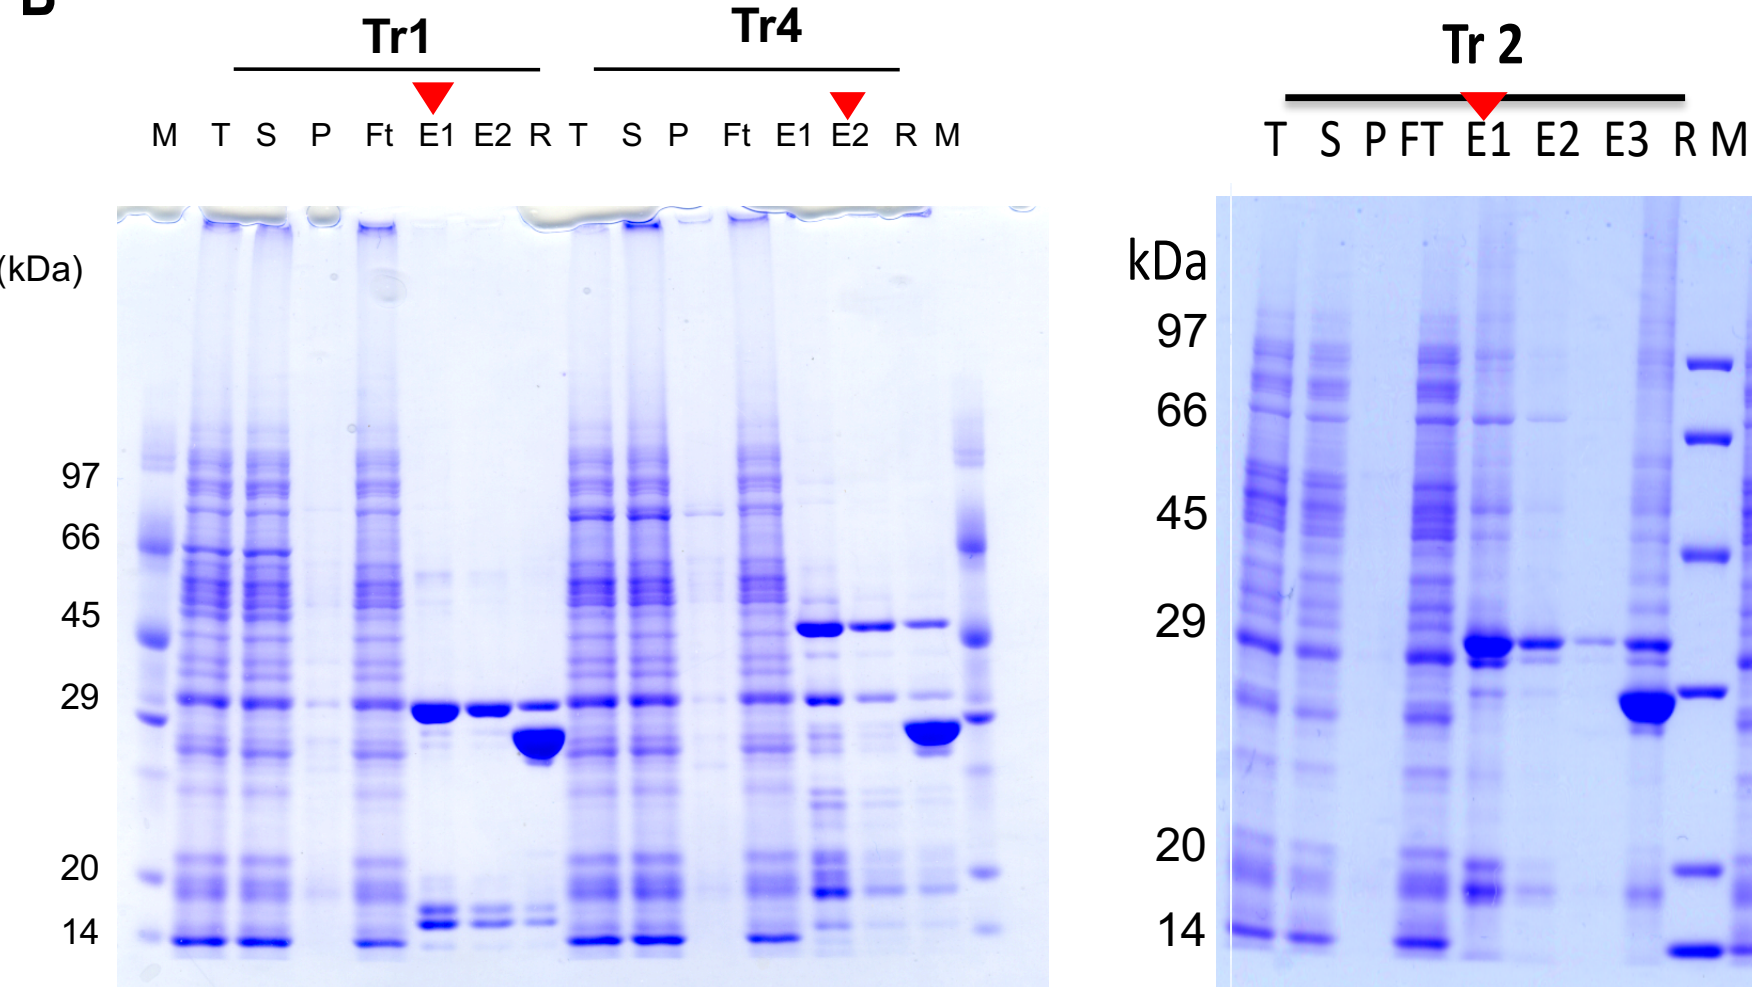

M: marker  
 T: total translation mix  
 S: supernatant  
 P: pellet  
 E1: elution 1  
 E2: Elution 2  
 Ft: flow through  
 R: resin

▼ Presented in the main manuscript

**Fig 1****B**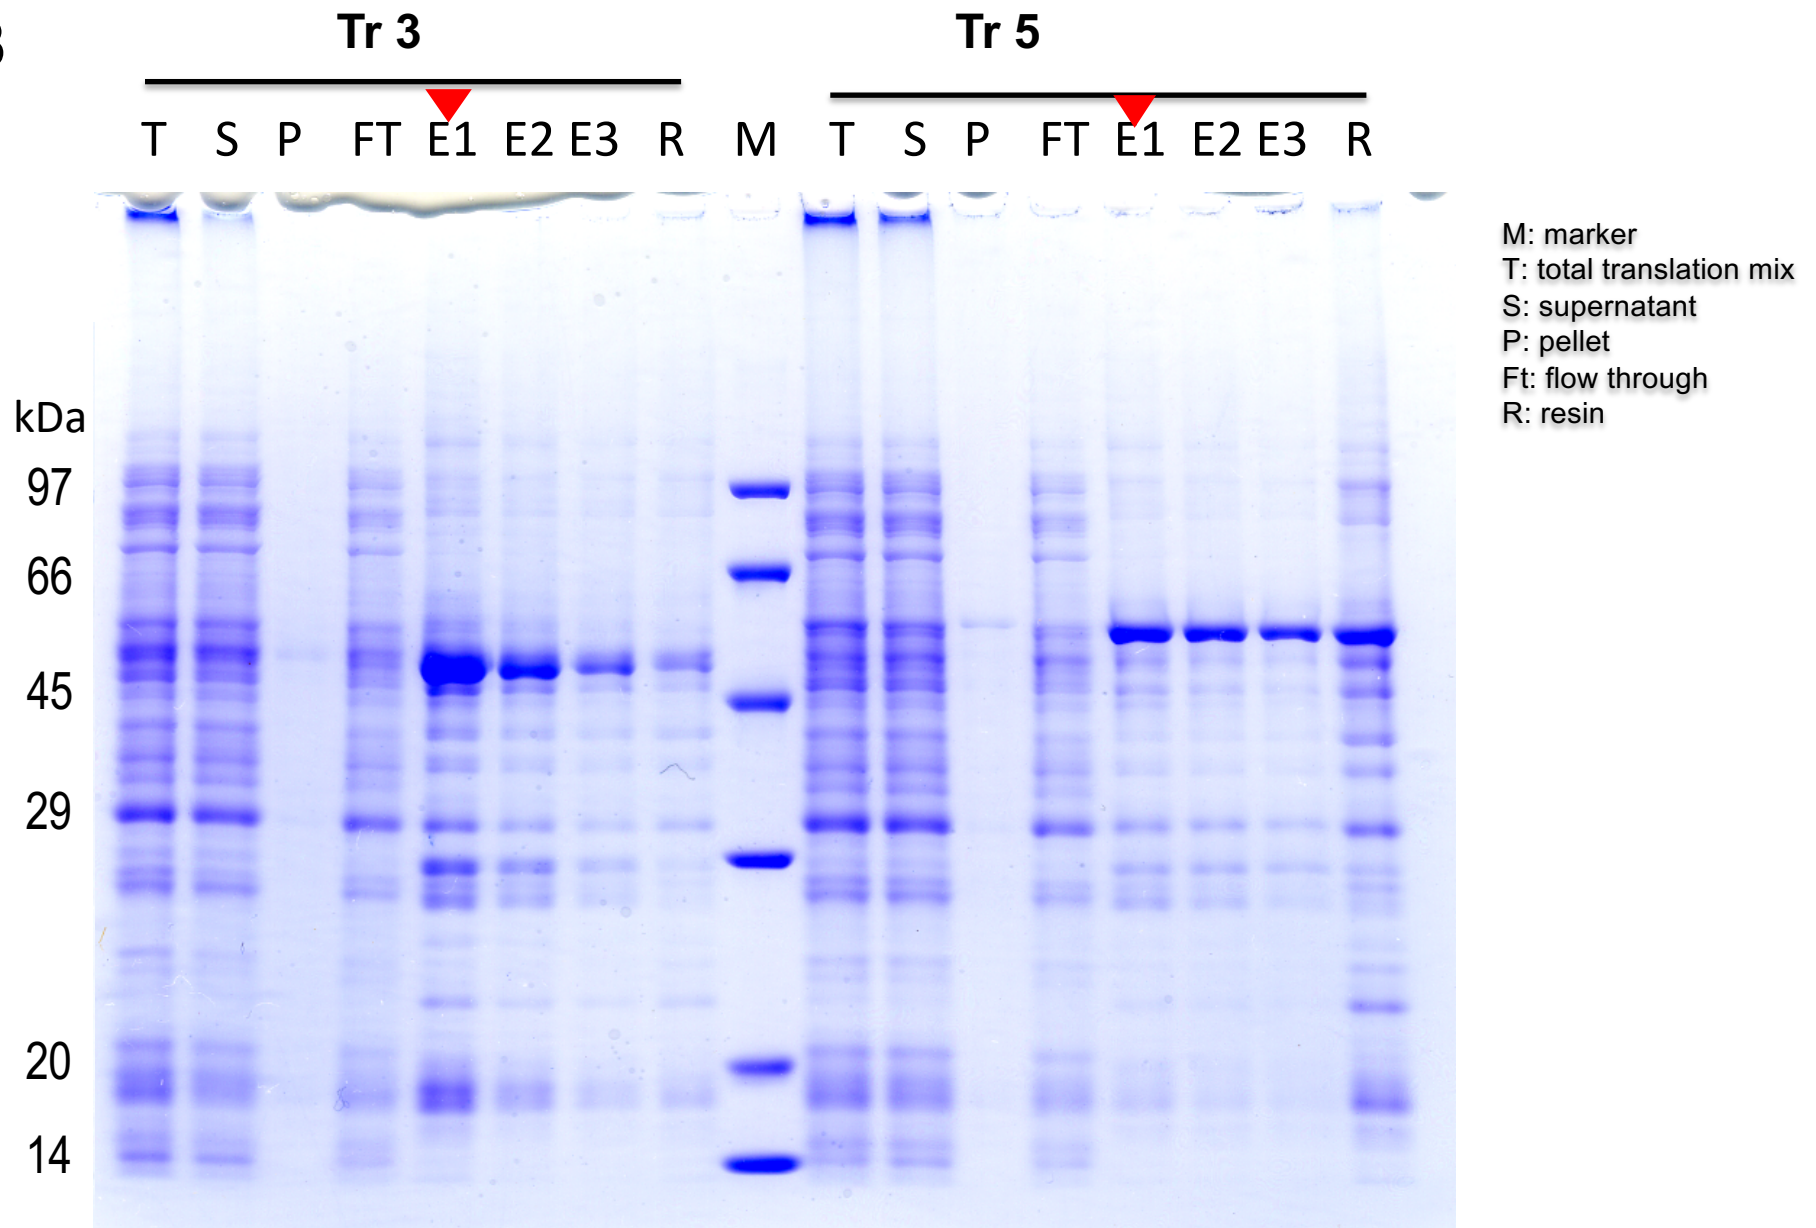

▼ Presented in the main manuscript

**C**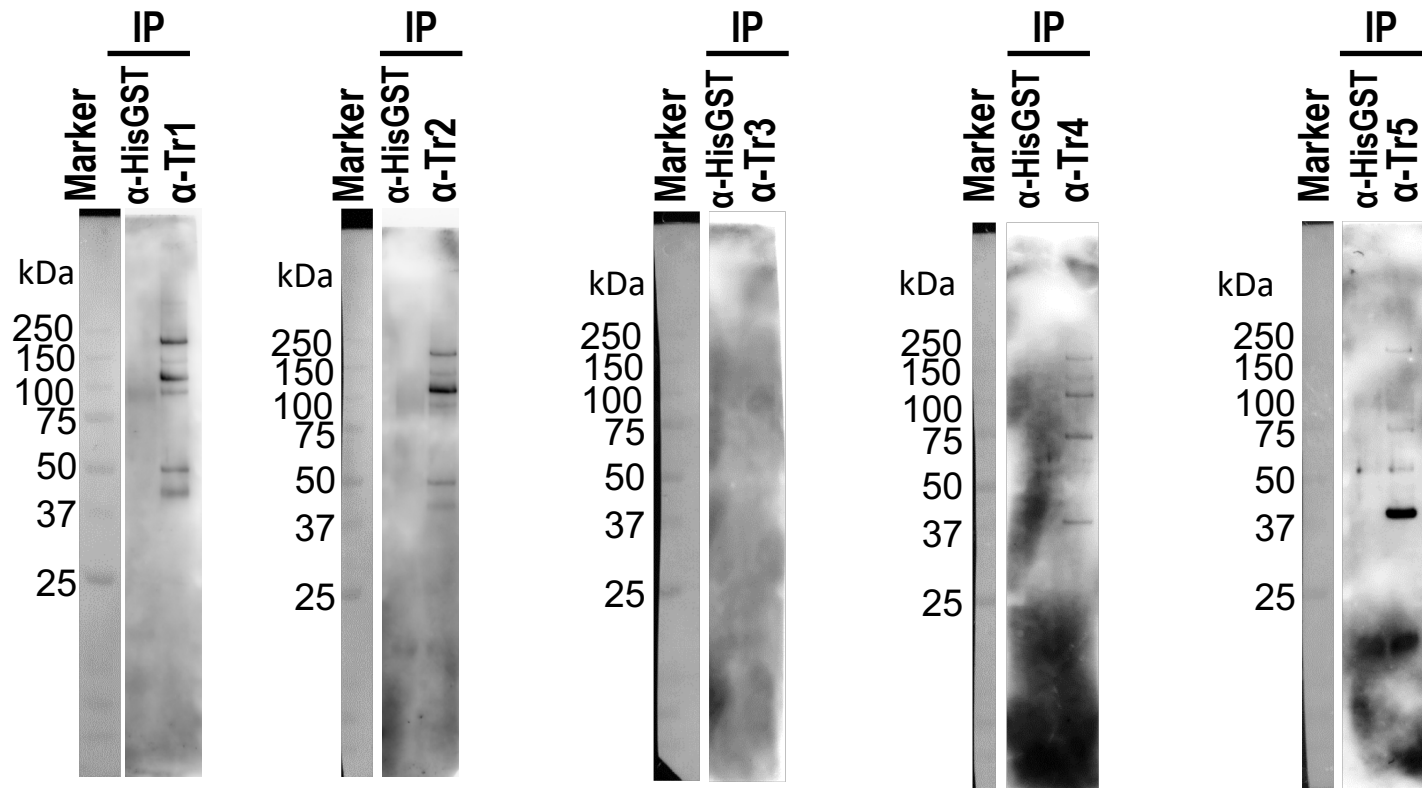

**Fig 2**

**A**

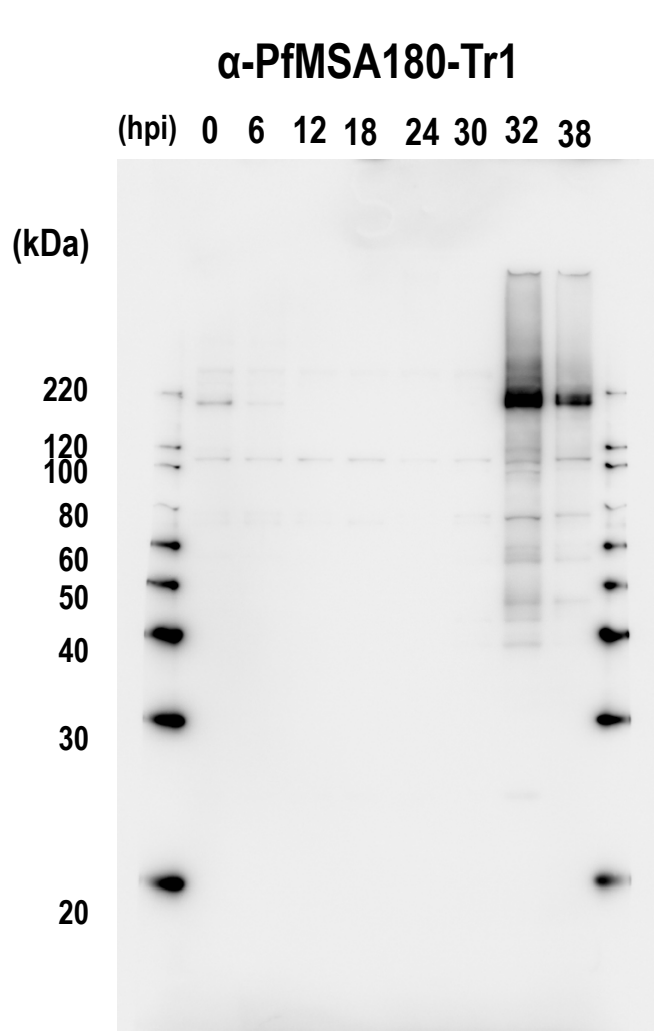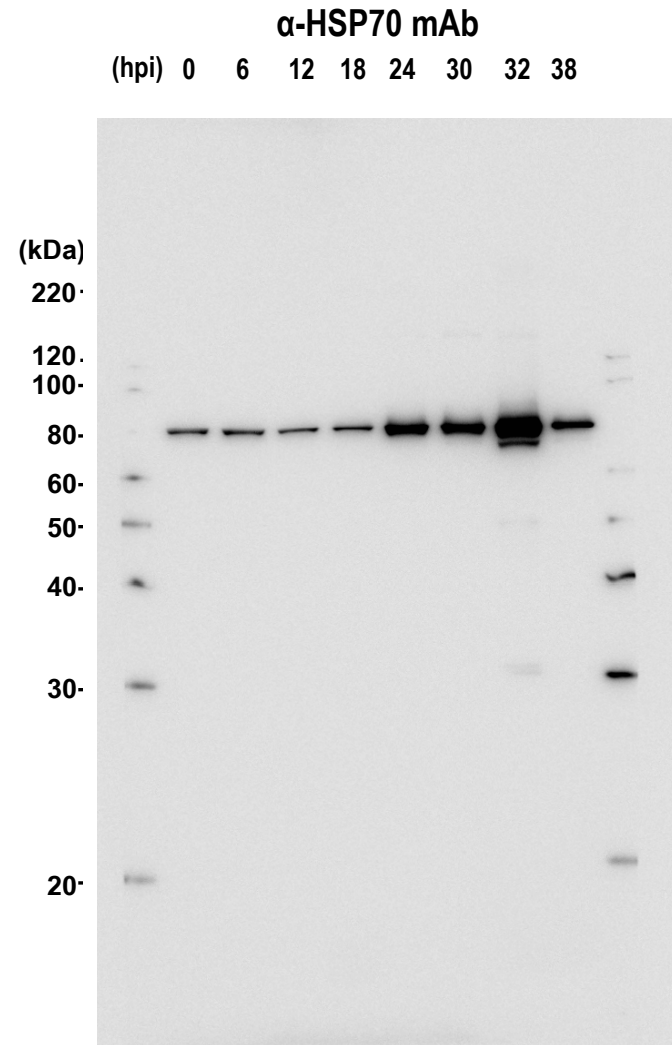

## A

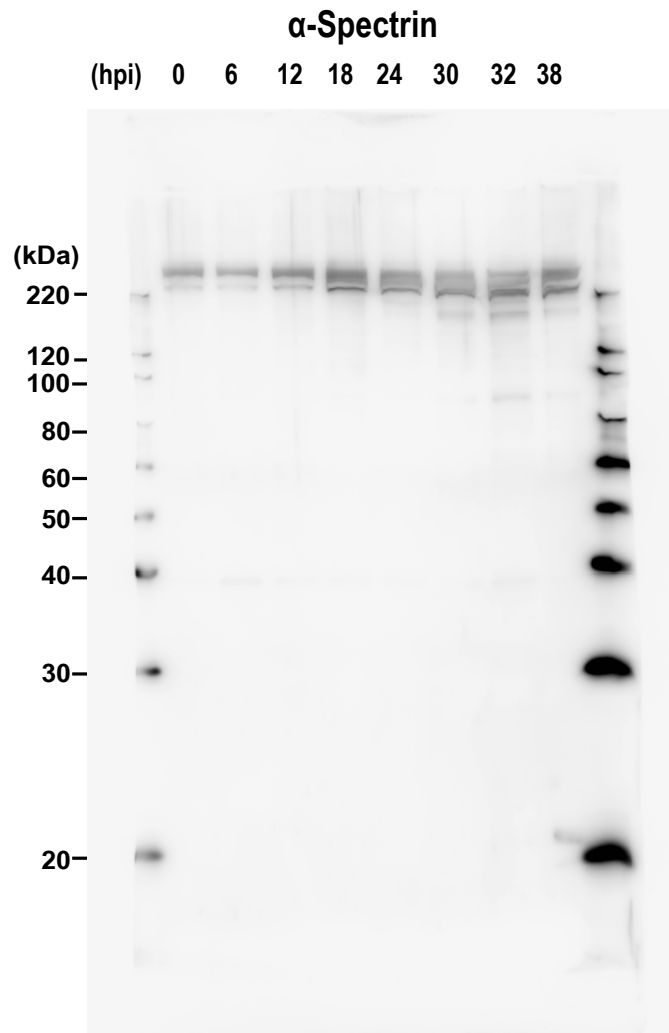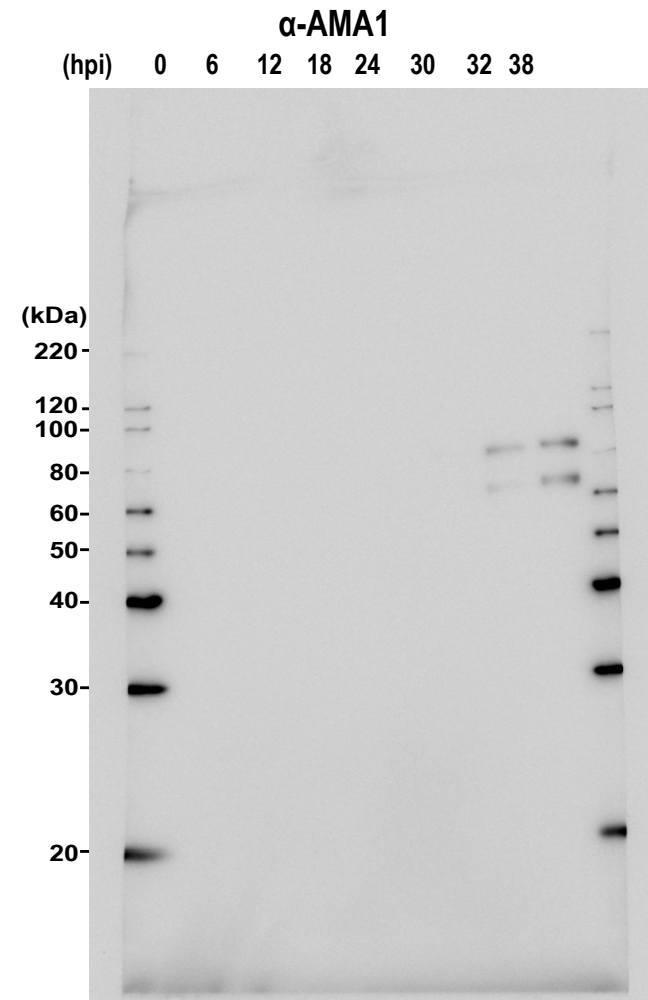

# Fig 2

PfMSA180 is a novel *Plasmodium falciparum* vaccine antigen

## D

**$\alpha$ -PfMSA180-Tr1**  
TL S M

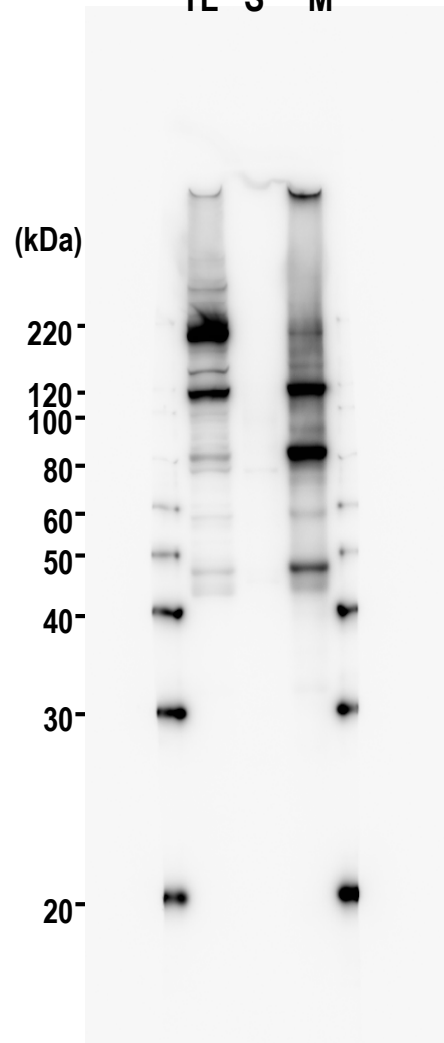

**$\alpha$ -MSP3**  
TL S M

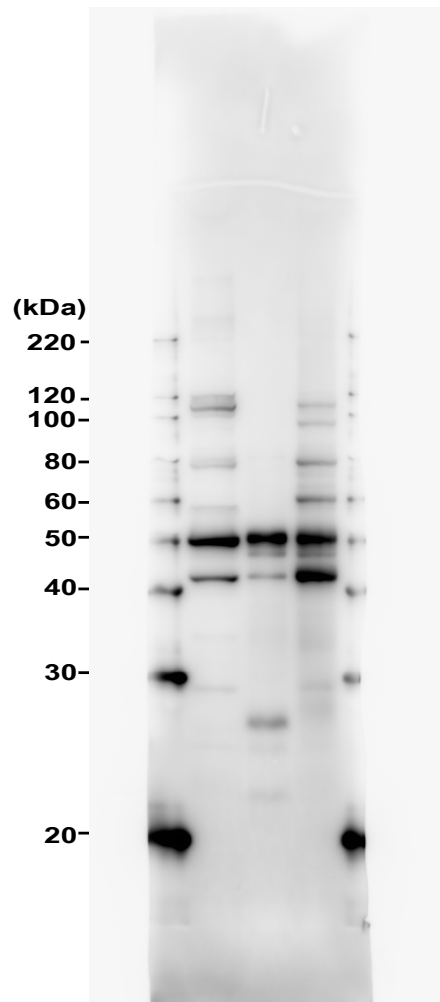

**$\alpha$ -AMA1**  
TL S M

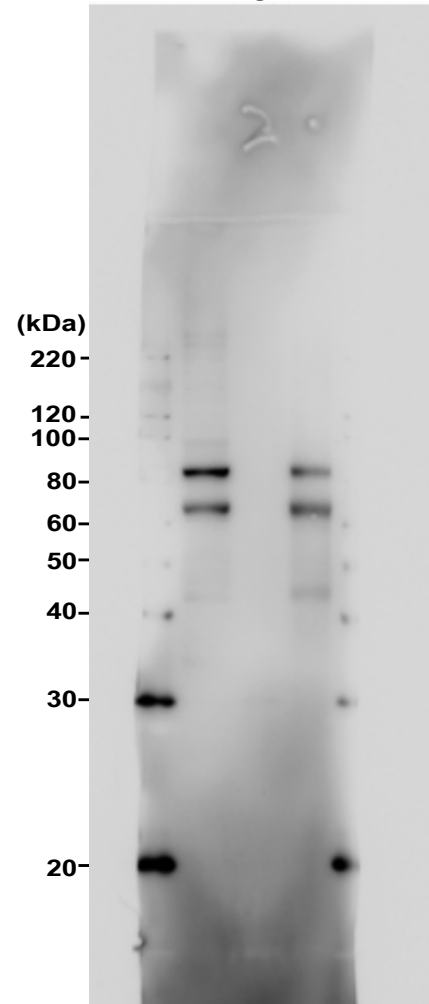

**$\alpha$ -MSP1-19**  
TL S M

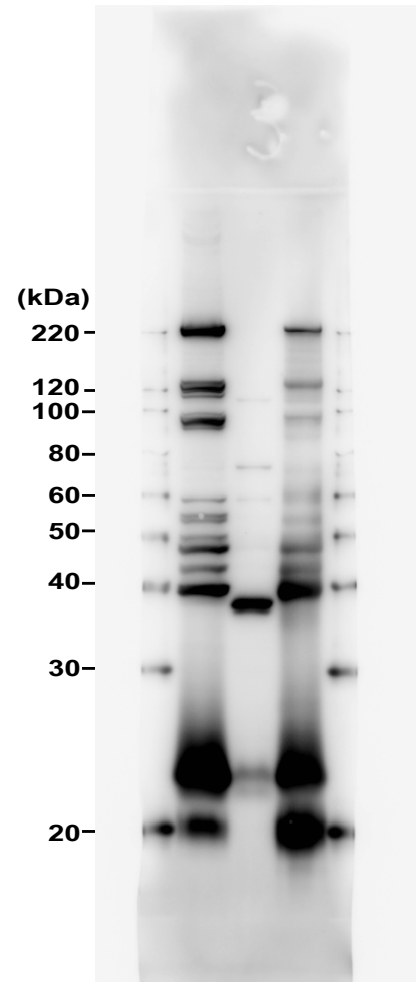

# Fig 4

## A

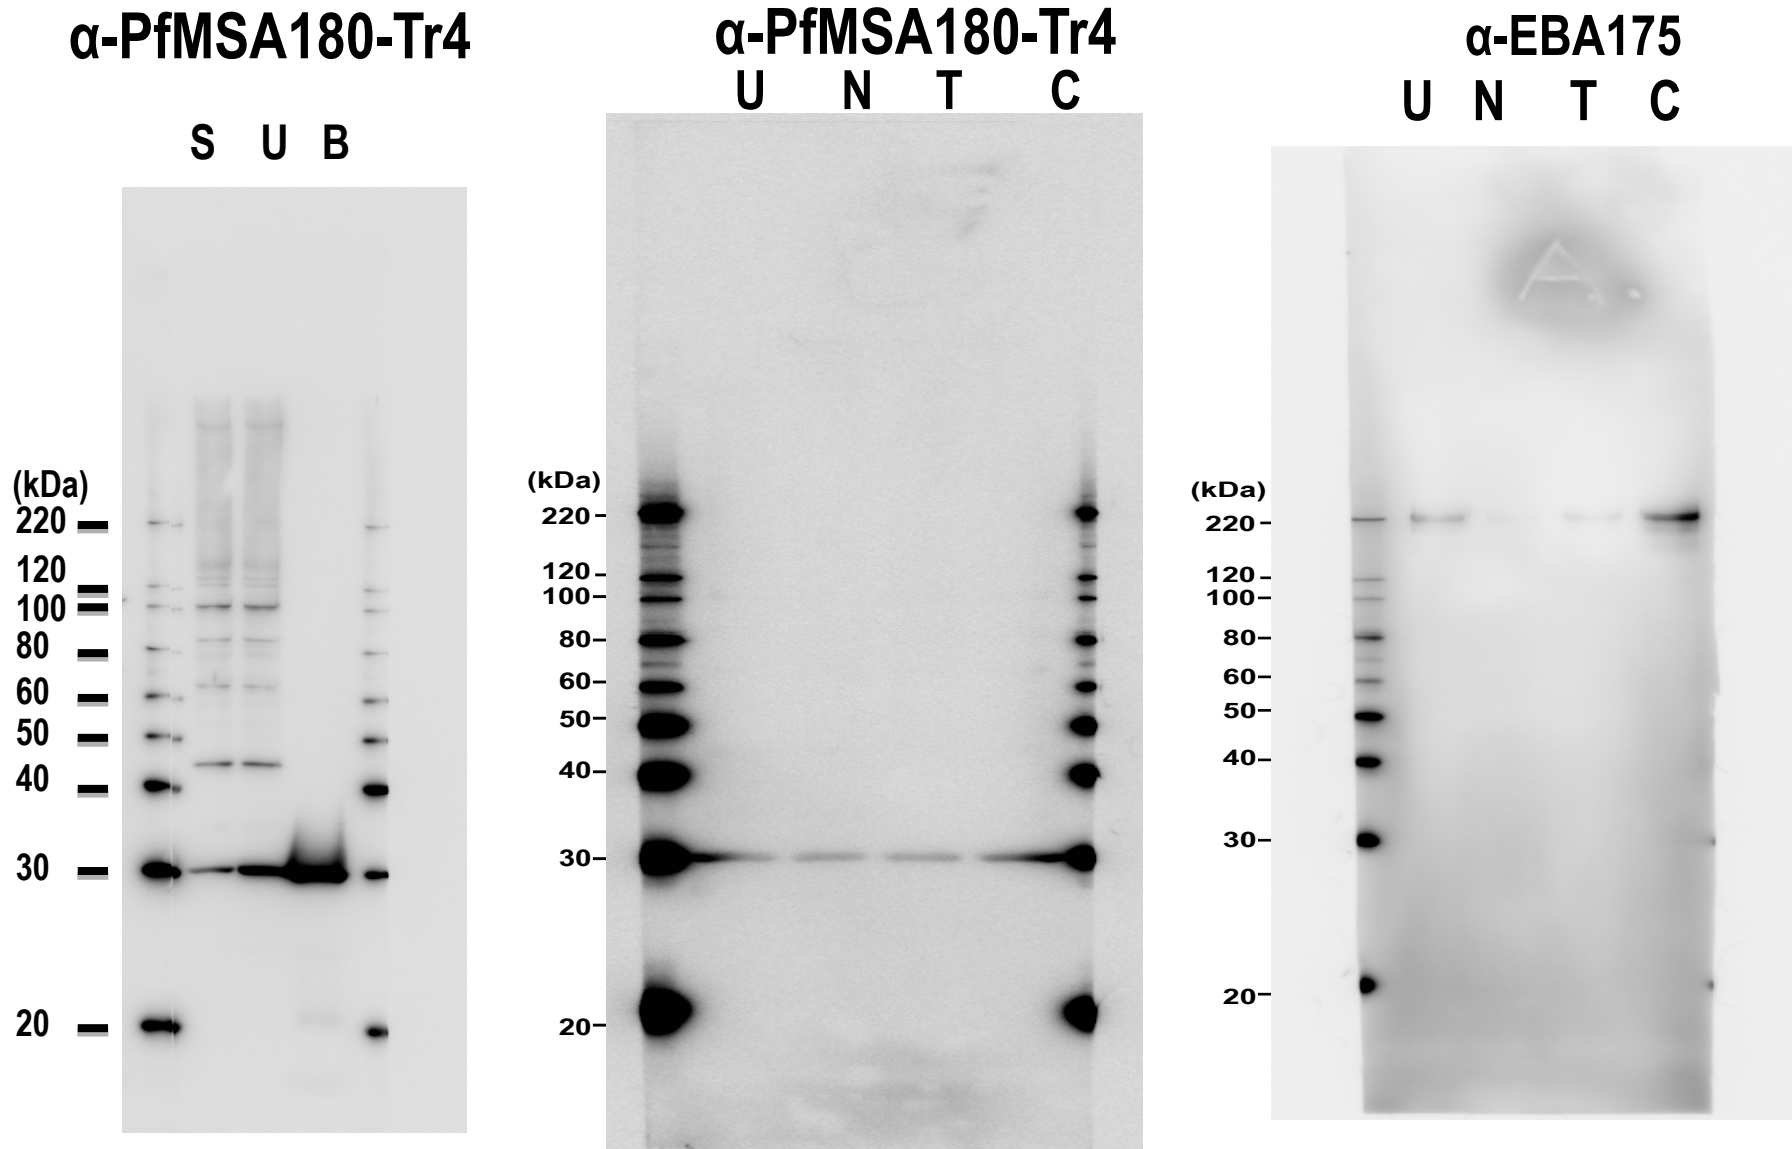

Supplement: 41598_2019_42366_MOESM2_ESM.pdf [file 41598_2019_42366_MOESM2_ESM.pdf]
