# Supplementary material for: PfMSA180 is a novel Plasmodium falciparum vaccine antigen that interacts with human erythrocyte integrin associated protein (CD47)
Source: PubMed Central journal article supplement (PMC6459815; doi:10.1038/s41598-019-42366-9), 2019-04-11
Supplement: 41598_2019_42366_MOESM3_ESM.pdf [file 41598_2019_42366_MOESM3_ESM.pdf]

## SUPPLEMENTARY DATA FILE 2

### **PfMSA180 is a novel *Plasmodium falciparum* vaccine antigen that interacts with human erythrocyte integrin associated protein (CD47)**

Hikaru Nagaoka<sup>1</sup>, Chisa Sasaoka<sup>1</sup>, Takaaki Yuguchi<sup>1</sup>, Bernard N. Kanoi<sup>1</sup>, Daisuke Ito<sup>2</sup>, Masayuki Morita<sup>1</sup>, Rachanee Udomsangpetch<sup>3</sup>, Jetsumon Sattabongkot<sup>4</sup>, Tomoko Ishino<sup>5</sup>, Takafumi Tsuboi<sup>1</sup>, Eizo Takashima<sup>1,\*</sup>

<sup>1</sup> Division of Malaria Research, Proteo-Science Center, Ehime University, 3 Bunkyo-cho, Matsuyama, Ehime 790-8577, Japan;

<sup>2</sup> Division of Medical Zoology, Department of Microbiology and Immunology, Faculty of Medicine, Tottori University, 86 Nishi-cho, Yonago, Tottori 683-8503, Japan;

<sup>3</sup> Center for Research and Innovation, Faculty of Medical Technology, Mahidol University, Salaya, Nakhosn Pathom 73170, Thailand;

<sup>4</sup> Mahidol Vivax Research Unit, Faculty of Tropical Medicine, Mahidol University, Bangkok 10400, Thailand;

<sup>5</sup> Division of Molecular Parasitology, Proteo-Science Center, Ehime University, Toon Ehime 791-0295, Japan

\* Corresponding author

Address: Division of Malaria Research, Proteo-Science Center, Ehime University, Japan, 3 Bunkyo-cho, Matsuyama, Ehime 790-8577, Japan. Tel.: (+81) 89 927 9939. E-mail address: takashima.eizo.mz@ehime-u.ac.jp

+ Majority

Majority

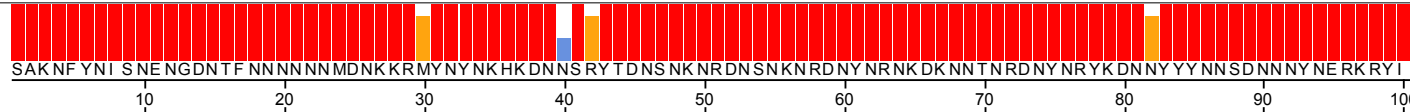

| Accession           | 1 | 2 | 3 | 4 | 5 | 6 | 7 | 8 | 9 | 10 | 11 | 12 | 13 | 14 | 15 | 16 | 17 | 18 | 19 | 20 | 21 | 22 | 23 | 24 | 25 | 26 | 27 | 28 | 29 | 30 | 31 | 32 | 33 | 34 | 35 | 36 | 37 | 38 | 39 | 40 | 41 | 42 | 43 | 44 | 45 | 46 | 47 | 48 | 49 | 50 | 51 | 52 | 53 | 54 | 55 | 56 | 57 | 58 | 59 | 60 | 61 | 62 | 63 | 64 | 65 | 66 | 67 | 68 | 69 | 70 | 71 | 72 | 73 | 74 | 75 | 76 | 77 | 78 | 79 | 80 | 81 | 82 | 83 | 84 | 85 | 86 | 87 | 88 | 89 | 90 | 91 | 92 | 93 | 94 | 95 | 96 | 97 | 98 | 99 | 100 |
|---------------------|---|---|---|---|---|---|---|---|---|----|----|----|----|----|----|----|----|----|----|----|----|----|----|----|----|----|----|----|----|----|----|----|----|----|----|----|----|----|----|----|----|----|----|----|----|----|----|----|----|----|----|----|----|----|----|----|----|----|----|----|----|----|----|----|----|----|----|----|----|----|----|----|----|----|----|----|----|----|----|----|----|----|----|----|----|----|----|----|----|----|----|----|----|----|----|----|----|----|----|-----|
| 1.Pf3D7_10_v3       | S | A | K | N | F | Y | N | I | S | N  | E  | N  | G  | D  | N  | T  | F  | N  | N  | N  | N  | M  | D  | N  | K  | K  | R  | M  | Y  | N  | Y  | N  | K  | H  | K  | D  | N  | S  | R  | Y  | T  | D  | N  | S  | N  | K  | N  | R  | D  | N  | S  | N  | K  | N  | R  | D  | N  | Y  | N  | R  | N  | K  | D  | K  | N  | N  | T  | N  | R  | D  | N  | N  | R  | Y  | K  | D  | N  | N  | Y  | Y  | N  | N  | S  | D  | N  | N  | N  | Y  | N  | E  | R  | K  | R  | Y  | I  |    |    |    |    |     |
| 1.AA_CAMBONDIA_KH01 | S | A | K | N | F | Y | N | I | S | N  | E  | N  | G  | D  | N  | T  | F  | N  | N  | N  | N  | M  | D  | N  | K  | K  | R  | M  | Y  | N  | Y  | N  | K  | H  | K  | D  | N  | S  | R  | Y  | T  | D  | N  | S  | N  | K  | N  | R  | D  | N  | S  | N  | K  | N  | R  | D  | N  | Y  | N  | R  | N  | K  | D  | K  | N  | N  | T  | N  | R  | D  | N  | N  | R  | Y  | K  | D  | N  | N  | Y  | Y  | N  | N  | S  | D  | N  | N  | N  | Y  | N  | E  | R  | K  | R  | Y  | I  |    |    |    |    |     |
| 1.AA_LAOS_Dd2-1     | S | A | K | N | F | Y | N | I | S | N  | E  | N  | G  | D  | N  | T  | F  | N  | N  | N  | N  | M  | D  | N  | K  | K  | R  | M  | Y  | N  | Y  | N  | K  | H  | K  | D  | N  | S  | R  | Y  | T  | D  | N  | S  | N  | K  | N  | R  | D  | N  | S  | N  | K  | N  | R  | D  | N  | Y  | N  | R  | N  | K  | D  | K  | N  | N  | T  | N  | R  | D  | N  | N  | R  | Y  | K  | D  | N  | N  | Y  | Y  | N  | N  | S  | D  | N  | N  | N  | Y  | N  | E  | R  | K  | R  | Y  | I  |    |    |    |    |     |
| 1.AA_LAOS_Dd2-2     | S | A | K | N | F | Y | N | I | S | N  | E  | N  | G  | D  | N  | T  | F  | N  | N  | N  | N  | M  | D  | N  | K  | K  | R  | M  | Y  | N  | Y  | N  | K  | H  | K  | D  | N  | S  | R  | Y  | T  | D  | N  | S  | N  | K  | N  | R  | D  | N  | S  | N  | K  | N  | R  | D  | N  | Y  | N  | R  | N  | K  | D  | K  | N  | N  | T  | N  | R  | D  | N  | N  | R  | Y  | K  | D  | N  | N  | Y  | Y  | N  | N  | S  | D  | N  | N  | N  | Y  | N  | E  | R  | K  | R  | Y  | I  |    |    |    |    |     |
| 1.AA_THAI_DD2_WTSI  | S | A | K | N | F | Y | N | I | S | N  | E  | N  | G  | D  | N  | T  | F  | N  | N  | N  | N  | M  | D  | N  | K  | K  | R  | M  | Y  | N  | Y  | N  | K  | H  | K  | D  | N  | S  | R  | Y  | T  | D  | N  | S  | N  | K  | N  | R  | D  | N  | S  | N  | K  | N  | R  | D  | N  | Y  | N  | R  | N  | K  | D  | K  | N  | N  | T  | N  | R  | D  | N  | N  | R  | Y  | K  | D  | N  | N  | Y  | Y  | N  | N  | S  | D  | N  | N  | N  | Y  | N  | E  | R  | K  | R  | Y  | I  |    |    |    |    |     |
| 1.AA_THAI_T9_94     | S | A | K | N | F | Y | N | I | S | N  | E  | N  | G  | D  | N  | T  | F  | N  | N  | N  | N  | M  | D  | N  | K  | K  | R  | M  | Y  | N  | Y  | N  | K  | H  | K  | D  | N  | S  | R  | Y  | T  | D  | N  | S  | N  | K  | N  | R  | D  | N  | S  | N  | K  | N  | R  | D  | N  | Y  | N  | R  | N  | K  | D  | K  | N  | N  | T  | N  | R  | D  | N  | N  | R  | Y  | K  | D  | N  | N  | Y  | Y  | N  | N  | S  | D  | N  | N  | N  | Y  | N  | E  | R  | K  | R  | Y  | I  |    |    |    |    |     |
| 303.1               | S | A | K | N | F | Y | N | I | S | N  | E  | N  | G  | D  | N  | T  | F  | N  | N  | N  | N  | M  | D  | N  | K  | K  | R  | M  | Y  | N  | Y  | N  | K  | H  | K  | D  | N  | S  | R  | Y  | T  | D  | N  | S  | N  | K  | N  | R  | D  | N  | S  | N  | K  | N  | R  | D  | N  | Y  | N  | R  | N  | K  | D  | K  | N  | N  | T  | N  | R  | D  | N  | N  | R  | Y  | K  | D  | N  | N  | Y  | Y  | N  | N  | S  | D  | N  | N  | N  | Y  | N  | E  | R  | K  | R  | Y  | I  |    |    |    |    |     |
| 309.1               | S | A | K | N | F | Y | N | I | S | N  | E  | N  | G  | D  | N  | T  | F  | N  | N  | N  | N  | M  | D  | N  | K  | K  | R  | M  | Y  | N  | Y  | N  | K  | H  | K  | D  | N  | S  | R  | Y  | T  | D  | N  | S  | N  | K  | N  | R  | D  | N  | S  | N  | K  | N  | R  | D  | N  | Y  | N  | R  | N  | K  | D  | K  | N  | N  | T  | N  | R  | D  | N  | N  | R  | Y  | K  | D  | N  | N  | Y  | Y  | N  | N  | S  | D  | N  | N  | N  | Y  | N  | E  | R  | K  | R  | Y  | I  |    |    |    |    |     |
| 318.1               | S | A | K | N | F | Y | N | I | S | N  | E  | N  | G  | D  | N  | T  | F  | N  | N  | N  | N  | M  | D  | N  | K  | K  | R  | M  | Y  | N  | Y  | N  | K  | H  | K  | D  | N  | S  | R  | Y  | T  | D  | N  | S  | N  | K  | N  | R  | D  | N  | S  | N  | K  | N  | R  | D  | N  | Y  | N  | R  | N  | K  | D  | K  | N  | N  | T  | N  | R  | D  | N  | N  | R  | Y  | K  | D  | N  | N  | Y  | Y  | N  | N  | S  | D  | N  | N  | N  | Y  | N  | E  | R  | K  | R  | Y  | I  |    |    |    |    |     |
| 326.1               | S | A | K | N | F | Y | N | I | S | N  | E  | N  | G  | D  | N  | T  | F  | N  | N  | N  | N  | M  | D  | N  | K  | K  | R  | M  | Y  | N  | Y  | N  | K  | H  | K  | D  | N  | S  | R  | Y  | T  | D  | N  | S  | N  | K  | N  | R  | D  | N  | S  | N  | K  | N  | R  | D  | N  | Y  | N  | R  | N  | K  | D  | K  | N  | N  | T  | N  | R  | D  | N  | N  | R  | Y  | K  | D  | N  | N  | Y  | Y  | N  | N  | S  | D  | N  | N  | N  | Y  | N  | E  | R  | K  | R  | Y  | I  |    |    |    |    |     |
| 327.1               | S | A | K | N | F | Y | N | I | S | N  | E  | N  | G  | D  | N  | T  | F  | N  | N  | N  | N  | M  | D  | N  | K  | K  | R  | M  | Y  | N  | Y  | N  | K  | H  | K  | D  | N  | S  | R  | Y  | T  | D  | N  | S  | N  | K  | N  | R  | D  | N  | S  | N  | K  | N  | R  | D  | N  | Y  | N  | R  | N  | K  | D  | K  | N  | N  | T  | N  | R  | D  | N  | N  | R  | Y  | K  | D  | N  | N  | Y  | Y  | N  | N  | S  | D  | N  | N  | N  | Y  | N  | E  | R  | K  | R  | Y  | I  |    |    |    |    |     |
| 365.1               | S | A | K | N | F | Y | N | I | S | N  | E  | N  | G  | D  | N  | T  | F  | N  | N  | N  | N  | M  | D  | N  | K  | K  | R  | M  | Y  | N  | Y  | N  | K  | H  | K  | D  | N  | S  | R  | Y  | T  | D  | N  | S  | N  | K  | N  | R  | D  | N  | S  | N  | K  | N  | R  | D  | N  | Y  | N  | R  | N  | K  | D  | K  | N  | N  | T  | N  | R  | D  | N  | N  | R  | Y  | K  | D  | N  | N  | Y  | Y  | N  | N  | S  | D  | N  | N  | N  | Y  | N  | E  | R  | K  | R  | Y  | I  |    |    |    |    |     |
| 366.1               | S | A | K | N | F | Y | N | I | S | N  | E  | N  | G  | D  | N  | T  | F  | N  | N  | N  | N  | M  | D  | N  | K  | K  | R  | M  | Y  | N  | Y  | N  | K  | H  | K  | D  | N  | S  | R  | Y  | T  | D  | N  | S  | N  | K  | N  | R  | D  | N  | S  | N  | K  | N  | R  | D  | N  | Y  | N  | R  | N  | K  | D  | K  | N  | N  | T  | N  | R  | D  | N  | N  | R  | Y  | K  | D  | N  | N  | Y  | Y  | N  | N  | S  | D  | N  | N  | N  | Y  | N  | E  | R  | K  | R  | Y  | I  |    |    |    |    |     |
| 377.1               | S | A | K | N | F | Y | N | I | S | N  | E  | N  | G  | D  | N  | T  | F  | N  | N  | N  | N  | M  | D  | N  | K  | K  | R  | M  | Y  | N  | Y  | N  | K  | H  | K  | D  | N  | S  | R  | Y  | T  | D  | N  | S  | N  | K  | N  | R  | D  | N  | S  | N  | K  | N  | R  | D  | N  | Y  | N  | R  | N  | K  | D  | K  | N  | N  | T  | N  | R  | D  | N  | N  | R  | Y  | K  | D  | N  | N  | Y  | Y  | N  | N  | S  | D  | N  | N  | N  | Y  | N  | E  | R  | K  | R  | Y  | I  |    |    |    |    |     |
| 383.1               | S | A | K | N | F | Y | N | I | S | N  | E  | N  | G  | D  | N  | T  | F  | N  | N  | N  | N  | M  | D  | N  | K  | K  | R  | M  | Y  | N  | Y  | N  | K  | H  | K  | D  | N  | S  | R  | Y  | T  | D  | N  | S  | N  | K  | N  | R  | D  | N  | S  | N  | K  | N  | R  | D  | N  | Y  | N  | R  | N  | K  | D  | K  | N  | N  | T  | N  | R  | D  | N  | N  | R  | Y  | K  | D  | N  | N  | Y  | Y  | N  | N  | S  | D  | N  | N  | N  | Y  | N  | E  | R  | K  | R  | Y  | I  |    |    |    |    |     |
| 397.1               | S | A | K | N | F | Y | N | I | S | N  | E  | N  | G  | D  | N  | T  | F  | N  | N  | N  | N  | M  | D  | N  | K  | K  | R  | M  | Y  | N  | Y  | N  | K  | H  | K  | D  | N  | S  | R  | Y  | T  | D  | N  | S  | N  | K  | N  | R  | D  | N  | S  | N  | K  | N  | R  | D  | N  | Y  | N  | R  | N  | K  | D  | K  | N  | N  | T  | N  | R  | D  | N  | N  | R  | Y  | K  | D  | N  | N  | Y  | Y  | N  | N  | S  | D  | N  | N  | N  | Y  | N  | E  | R  | K  | R  | Y  | I  |    |    |    |    |     |
| 398.1               | S | A | K | N | F | Y | N | I | S | N  | E  | N  | G  | D  | N  | T  | F  | N  | N  | N  | N  | M  | D  | N  | K  | K  | R  | M  | Y  | N  | Y  | N  | K  | H  | K  | D  | N  | S  | R  | Y  | T  | D  | N  | S  | N  | K  | N  | R  | D  | N  | S  | N  | K  | N  | R  | D  | N  | Y  | N  | R  | N  | K  | D  | K  | N  | N  | T  | N  | R  | D  | N  | N  | R  | Y  | K  | D  | N  | N  | Y  | Y  | N  | N  | S  | D  | N  | N  | N  | Y  | N  | E  | R  | K  | R  | Y  | I  |    |    |    |    |     |
| 3D7_WTSI            | S | A | K | N | F | Y | N | I | S | N  | E  | N  | G  | D  | N  | T  | F  | N  | N  | N  | N  | M  | D  | N  | K  | K  | R  | M  | Y  | N  | Y  | N  | K  | H  | K  | D  | N  | S  | R  | Y  | T  | D  | N  | S  | N  | K  | N  | R  | D  | N  | S  | N  | K  | N  | R  | D  | N  | Y  | N  | R  | N  | K  | D  | K  | N  | N  | T  | N  | R  | D  | N  | N  | R  | Y  | K  | D  | N  | N  | Y  | Y  | N  | N  | S  | D  | N  | N  | N  | Y  | N  | E  | R  | K  | R  | Y  | I  |    |    |    |    |     |
| 58.1                | S | A | K | N | F | Y | N | I | S | N  | E  | N  | G  | D  | N  | T  | F  | N  | N  | N  | N  | M  | D  | N  | K  | K  | R  | M  | Y  | N  | Y  | N  | K  | H  | K  | D  | N  | S  | R  | Y  | T  | D  | N  | S  | N  | K  | N  | R  | D  | N  | S  | N  | K  | N  | R  | D  | N  | Y  | N  | R  | N  | K  | D  | K  | N  | N  | T  | N  | R  | D  | N  | N  | R  | Y  | K  | D  | N  | N  | Y  | Y  | N  | N  | S  | D  | N  | N  | N  | Y  | N  | E  | R  | K  | R  | Y  | I  |    |    |    |    |     |
| 707A                | S | A | K | N | F | Y | N | I | S | N  | E  | N  | G  | D  | N  | T  | F  | N  | N  | N  | N  | M  | D  | N  | K  | K  | R  | M  | Y  | N  | Y  | N  | K  | H  | K  | D  | N  | S  | R  | Y  | T  | D  | N  | S  | N  | K  | N  | R  | D  | N  | S  | N  | K  | N  | R  | D  | N  | Y  | N  | R  | N  | K  | D  | K  | N  | N  | T  | N  | R  | D  | N  | N  | R  | Y  | K  | D  | N  | N  | Y  | Y  | N  | N  | S  | D  | N  | N  | N  | Y  | N  | E  | R  | K  | R  | Y  | I  |    |    |    |    |     |
| 7G8_2               | S | A | K | N | F | Y | N | I | S | N  | E  | N  | G  | D  | N  | T  | F  | N  | N  | N  | N  | M  | D  | N  | K  | K  | R  | M  | Y  | N  | Y  | N  | K  | H  | K  | D  | N  | S  | R  | Y  | T  | D  | N  | S  | N  | K  | N  | R  | D  | N  | S  | N  | K  | N  | R  | D  | N  | Y  | N  | R  | N  | K  | D  | K  | N  | N  | T  | N  | R  | D  | N  | N  | R  | Y  | K  | D  | N  | N  | Y  | Y  | N  | N  | S  | D  | N  | N  | N  | Y  | N  | E  | R  | K  | R  | Y  | I  |    |    |    |    |     |
| 7G8                 | S | A | K | N | F | Y | N | I | S | N  | E  | N  | G  | D  | N  | T  | F  | N  | N  | N  | N  | M  | D  | N  | K  | K  | R  | M  | Y  | N  | Y  | N  | K  | H  | K  | D  | N  | S  | R  | Y  | T  | D  | N  | S  | N  | K  | N  | R  | D  | N  | S  | N  | K  | N  | R  | D  | N  | Y  | N  | R  | N  | K  | D  | K  | N  | N  | T  | N  | R  | D  | N  | N  | R  | Y  | K  | D  | N  | N  | Y  | Y  | N  | N  | S  | D  | N  | N  | N  | Y  | N  | E  | R  | K  | R  | Y  | I  |    |    |    |    |     |
| BM_0008             | S | A | K | N | F | Y | N | I | S | N  | E  | N  | G  | D  | N  | T  | F  | N  | N  | N  | N  | M  | D  | N  | K  | K  | R  | M  | Y  | N  | Y  | N  | K  | H  | K  | D  | N  | S  | R  | Y  | T  | D  | N  | S  | N  | K  | N  | R  | D  | N  | S  | N  | K  | N  | R  | D  | N  | Y  |    |    |    |    |    |    |    |    |    |    |    |    |    |    |    |    |    |    |    |    |    |    |    |    |    |    |    |    |    |    |    |    |    |    |    |    |    |    |    |    |    |     |
